# Supplementary material for: WO3 nanoflowers with excellent pseudo-capacitive performance and the capacitance contribution analysis
Source: Royal Society of Chemistry journal article supplement (doi:10.1039/c6ta00237d), 2016-01-01
Supplement: c6ta00237d2.pdf [file c6ta00237d2.pdf]

## Supporting Information for

# WO<sub>3</sub> nanoflowers with excellent pseudo-capacitive performance and the capacitance contribution analysis

Meijia Qiu<sup>a‡</sup>, Peng Sun<sup>a‡</sup>, Liuxue Shen<sup>b</sup>, Kun Wang<sup>c</sup>, Shuqin Song<sup>c</sup>, Xiang Yu<sup>d</sup>, Shaozao Tan<sup>b</sup>, Chuanxi Zhao<sup>\*a</sup>, Wenjie Mai<sup>\*a</sup>

<sup>a</sup> Siyuan laboratory, Guangzhou Key Laboratory of Vacuum Coating Technologies and New Energy Materials, Department of Physics, Jinan University, Guangzhou, Guangdong 510632, P.R.China

<sup>b</sup> Department of Chemistry, Jinan University, Guangzhou, Guangdong 510632, China.

<sup>c</sup> The Key Lab of Low-carbon Chemistry & Energy Conservation of Guangdong Province, Sun Yan-sen University, Guangzhou 510275, China

<sup>d</sup> Analytical and Testing Centre, Jinan University, Guangzhou 510632, China

Address corresponding to wenjiemai@gmail.com (WJM)

‡ These authors contribute equally to this work

## Calculation methods

### Single electrode

For a single electrode, its areal and gravimetric capacitance  $C_s$  and  $C_g$  can be calculated from the CV curves through the following equation:

$$C_s = \frac{\int IdU}{2\nu U_p} = \frac{S}{2\nu U_p}$$
$$C_g = \frac{\int IdU}{2\nu MU_p} = \frac{S}{2\nu MU_p}$$

where  $\nu$  is the scan rate,  $S$  is the area of the closed CV curve,  $U_p$  is the potential window and  $M$  is the mass loading of the active material. The area of the covered active material was controlled to be 1 cm<sup>2</sup>.

The area capacitance  $C_s$  of a single electrode based GCD curves can be calculated from the following equation:

$$C_s = \frac{It}{\Delta U}$$

where  $I$  is the discharge current,  $It$  is the discharge time,  $\Delta U$  is the potential window.

## Device

The area capacitance  $C_d$  of the device was calculated from the CV curves:

$$C_d = \frac{\int IdU}{2\nu U_w} = \frac{S}{2\nu U_w}$$

where  $\nu$  is the scan rate,  $S$  is the area of the closed CV curve and  $U_w$  is the voltage window.

The volumetric capacitance  $C_v$  of device was calculated from the CV curves by the following equation:

$$C_v = \frac{\int IdU}{2\nu V U_w} = \frac{S}{2\nu V U_w}$$

where  $\nu$  is the scan rate,  $S$  is the area of the closed CV curve,  $V$  is the volume of the whole device, and  $U_w$  is the voltage window. The area of the covered active material was controlled to be 1 cm<sup>2</sup>.

And the energy density and the average power density can be gained by employing the following equation:

$$E = \frac{C_v U_w^2}{2}$$

$$P = \frac{E}{t}$$

$$t = \frac{U_w}{\nu}$$

in which  $C_v$  is the volumetric capacitance calculated before.

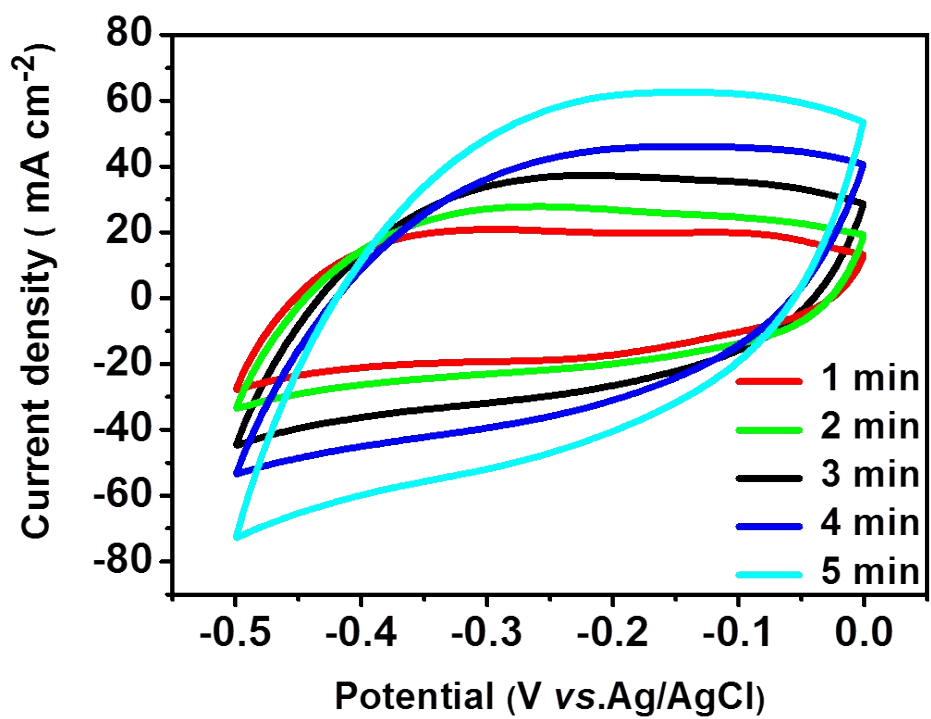

**Figure S1** Positive and negative electrodes at a scan rate of  $100 \text{ mV s}^{-1}$ , representing a proper capacitance ratio for asymmetric supercapacitor.

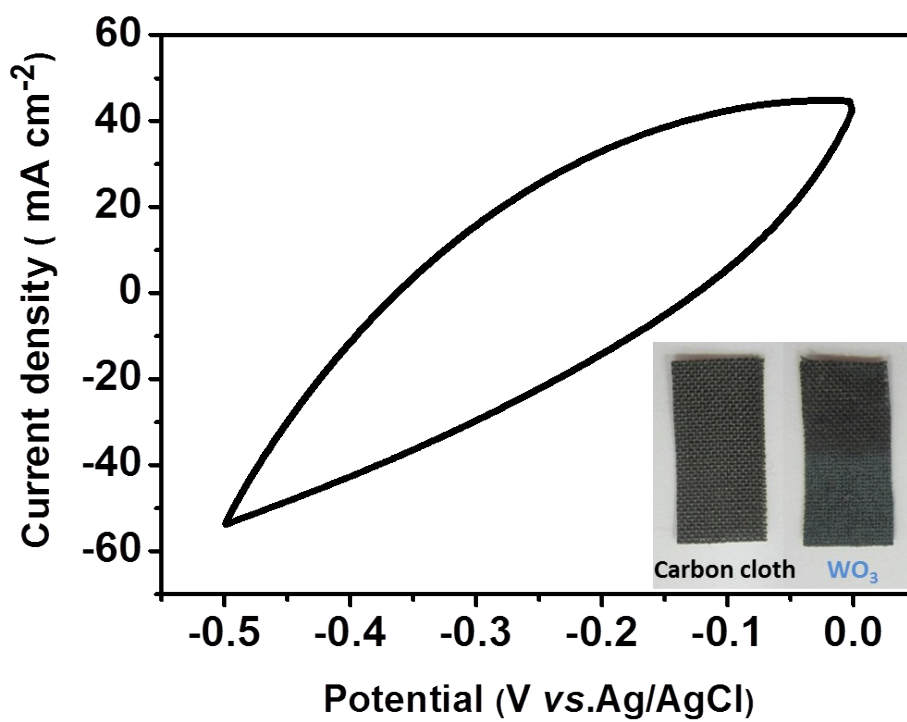

**Figure S2** CV curve of WO<sub>3</sub> deposited on carbon cloth, inset shows pictures of pure carbon cloth and WO<sub>3</sub> on it.

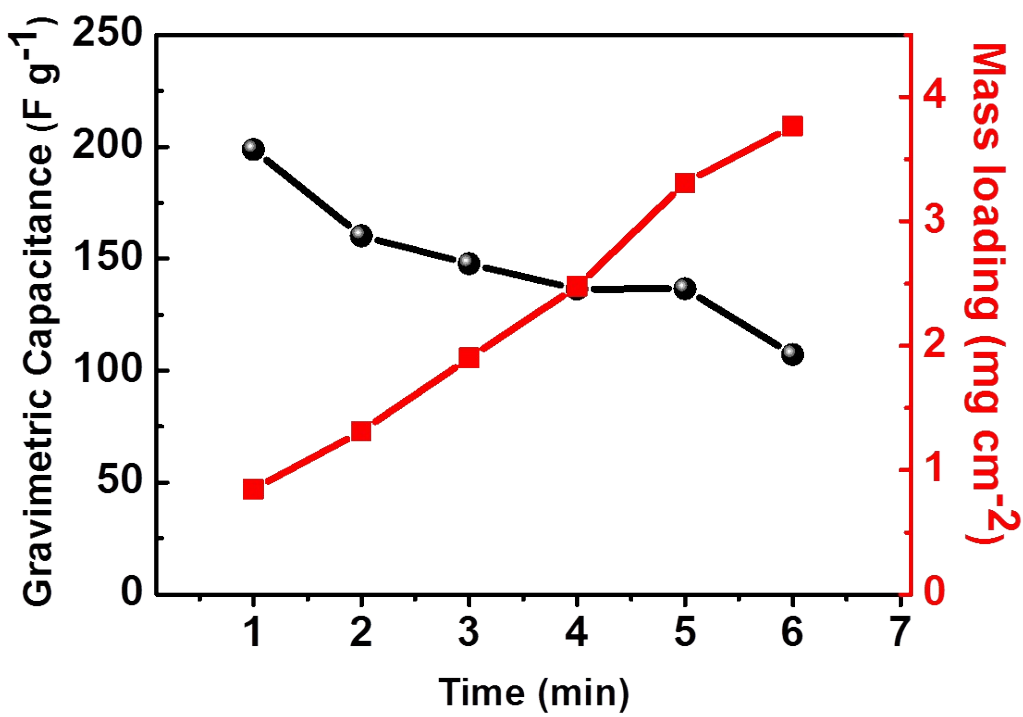

**Figure S3** Mass loading and gravimetric capacitance (at a scan rate of  $100 \text{ mV s}^{-1}$ ) of the NFL- $\text{WO}_3$  electrode at different deposition time.

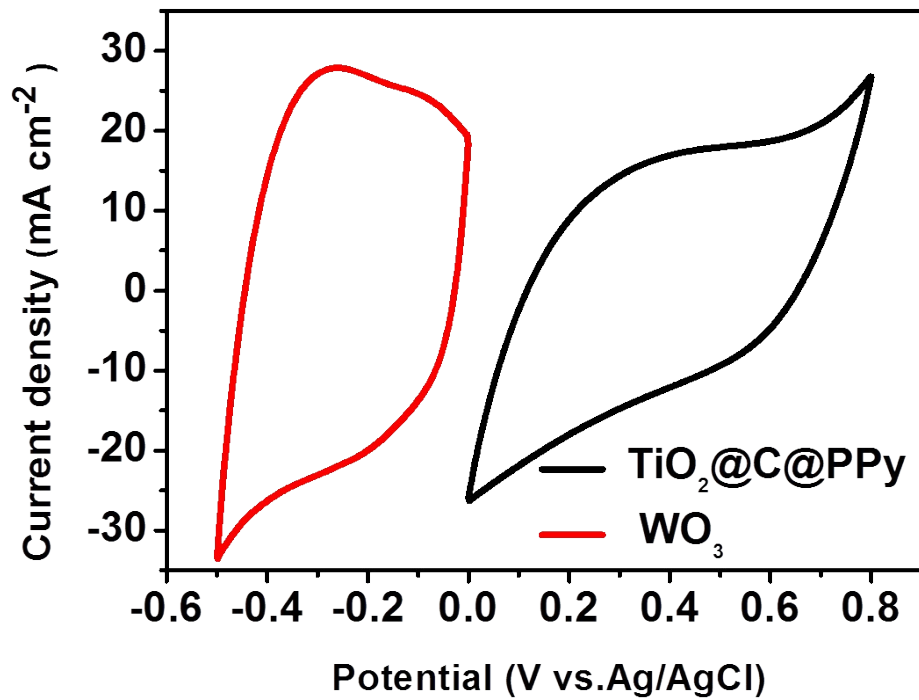

**Figure S4** Positive and negative electrodes at a scan rate of 100 mV s<sup>-1</sup>, representing a proper capacitance ratio for asymmetric supercapacitor.

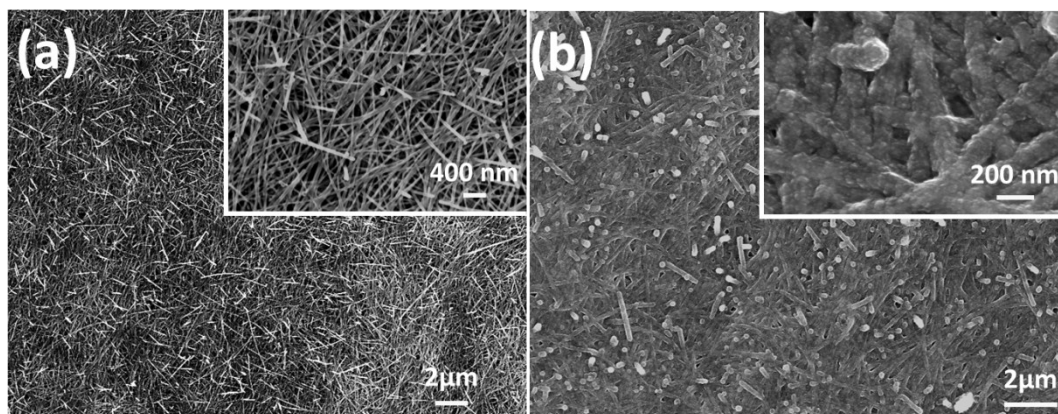

**Figure S5** SEM images of the positive electrode. (a) SEM image of the  $\text{TiO}_2@\text{C}$  NWs, inset shows the magnified picture. (b) SEM image of the  $\text{TiO}_2@\text{C}@PPy$  electrode, inset shows the magnified picture.

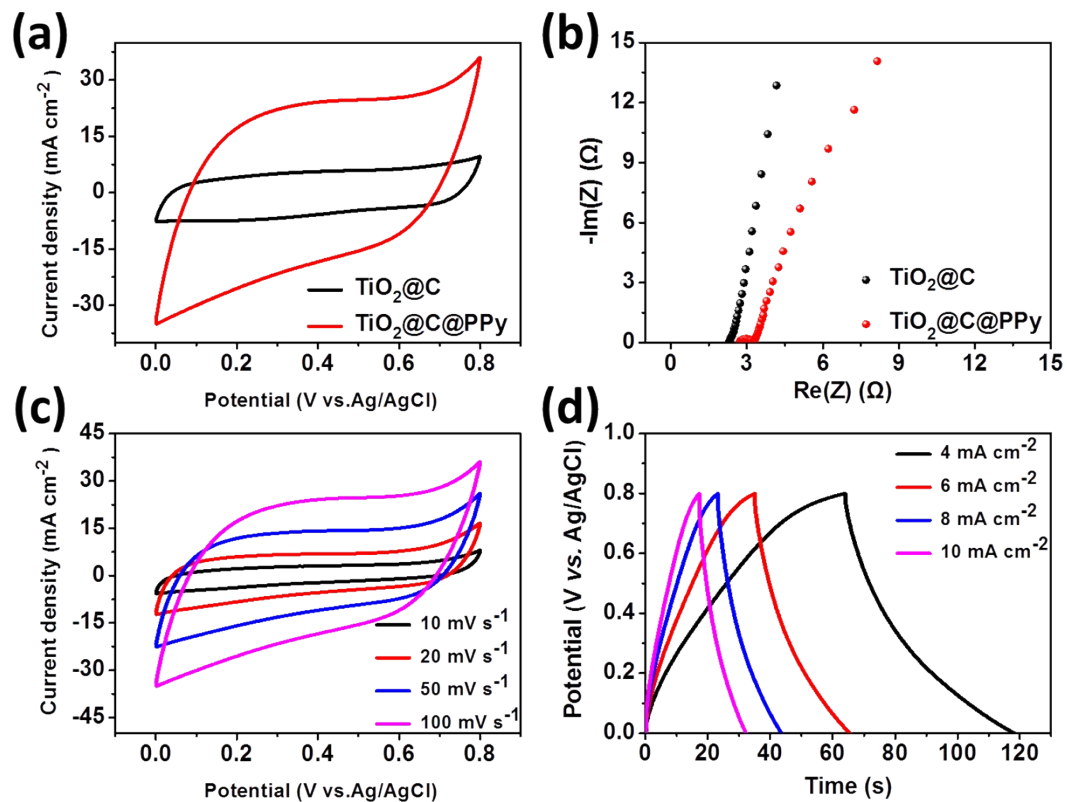

**Figure S6** Electrochemical performance of the  $\text{TiO}_2@\text{C}@PPy$  electrode. (a) CV curves of the  $\text{TiO}_2@\text{C}$  and  $\text{TiO}_2@\text{C}@PPy$  electrodes. (b) Nyquist plots of the  $\text{TiO}_2@\text{C}$  and  $\text{TiO}_2@\text{C}@PPy$ . (c) CV curves of the  $\text{TiO}_2@\text{C}@PPy$  electrode at different scan rates. (d) GCD curves of the  $\text{TiO}_2@\text{C}@PPy$  electrode at different current density.



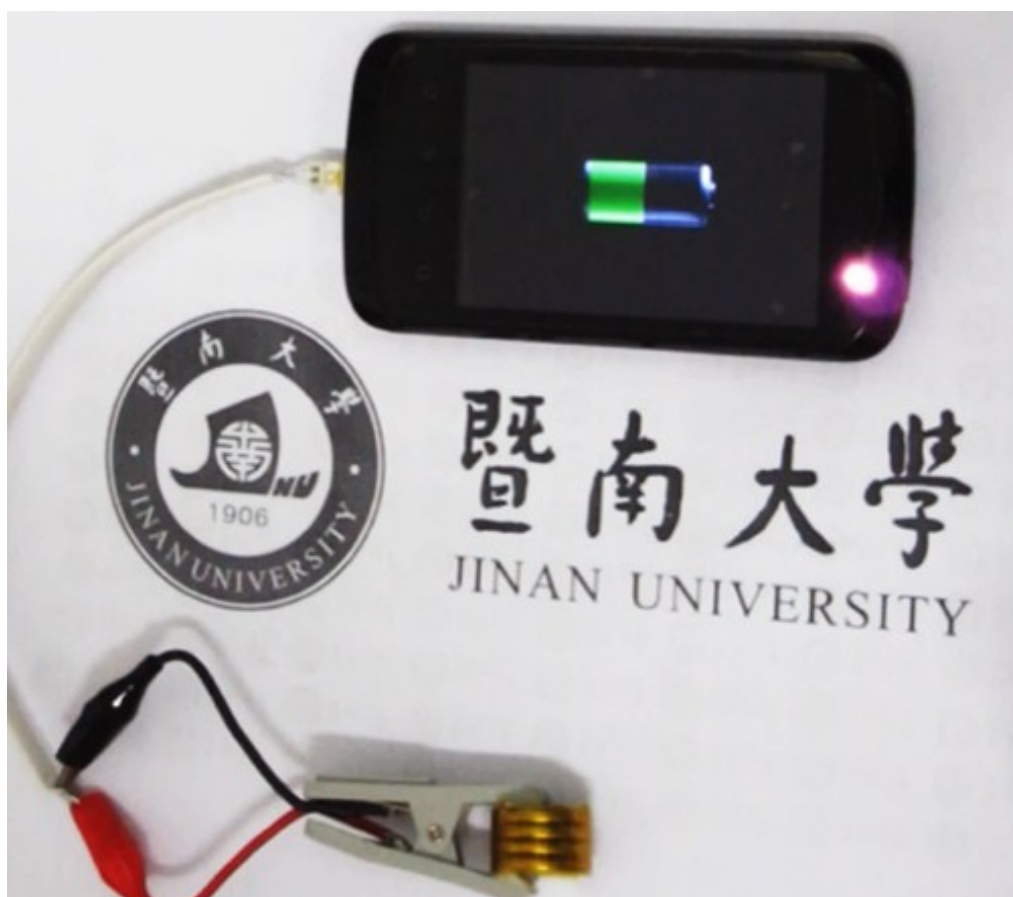

**Figure S7** Illustration about the application of tandem ASC devices charging a cellphone.
